# Supplementary material for: Optimisation of laser and mass spectrometer parameters for the in situ analysis of Rb/Sr ratios by LA-ICP-MS/MS
Source: Royal Society of Chemistry journal article supplement (doi:10.1039/d0ja00308e), 2020-01-01
Supplement: d0ja00308e1.pdf [file d0ja00308e1.pdf]

Figure Supplementary 1.

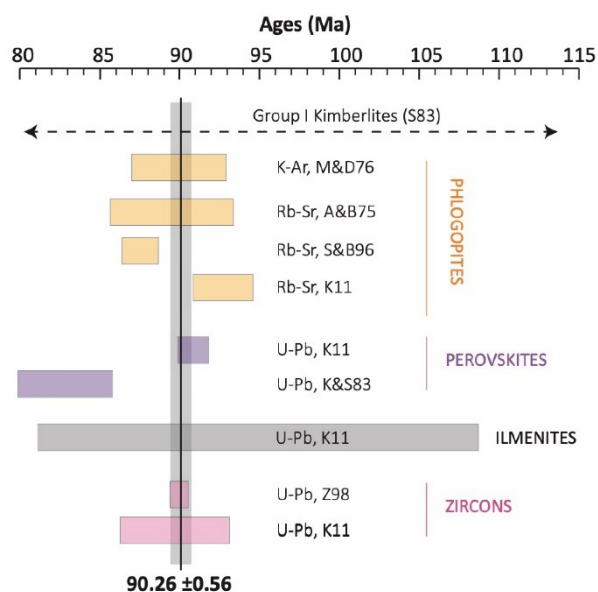

**Figure S1** Summary of Monastery kimberlite ages from previous studies and geochronological constraints. **S83**, Smith (1983) Group I kimberlites age range (80 – 114 Ma); **Phlogopites** - **M&D76**, McIntyre and Dawson (1976) K-Ar phlogopite age from Monastery ( $90 \pm 3$  Ma); **A&B75**, Allsopp and Barrett (1975) Rb-Sr on phlogopite megacrysts ( $89.6 \pm 3.9$  Ma), recomputed with  $^{87}\text{Rb}$ - $^{87}\text{Sr}$  decay constant of  $1.3972 \pm 0.0045 \cdot 10^{-11} \text{ a}^{-1}$ ; **S&B96** Smith and Barton (1996) Rb-Sr age on a single phlogopite megacryst ( $87.6 \pm 1.2$  Ma); **K11**, Knowles et al., (2011) leached and unleached fractions ( $n = 7$ ) of 2 phlogopite megacrysts ( $92.8 \pm 1.9$  Ma). **Perovskites** - **K11**, U-Pb age for 4 perovskite grain fractions ( $91.0 \pm 1.0$  Ma; Knowles et al., 2011), **K&S83**, Kramers and Smith (1983) U-Pb on perovskite ( $82.5 \pm 2.5$  Ma). **Ilmenites** - **K11**, Knowles et al., (2011) U-Pb age from 9 ilmenite fractions. **Zircons** - **Z98**, Zartman et al. (1998) U-Pb mantle zircon ( $90.1 \pm 0.5$  Ma); **K11**, Knowles et al., (2011) U-Pb age on a single zircon megacryst ( $88.8 \pm 0.5$  Ma). Weighed mean yields  $90.26 \pm 0.56$  Ma (95 % CI) for a MSWD ca. 0.66 and Chi-squared p-value of 0.66
